# Supplementary material
Source: PubMed Central journal article supplement (PMC8035920)

Lake Louise Score vs. Study Night at sea level (before and after) and high altitude (first and last night).

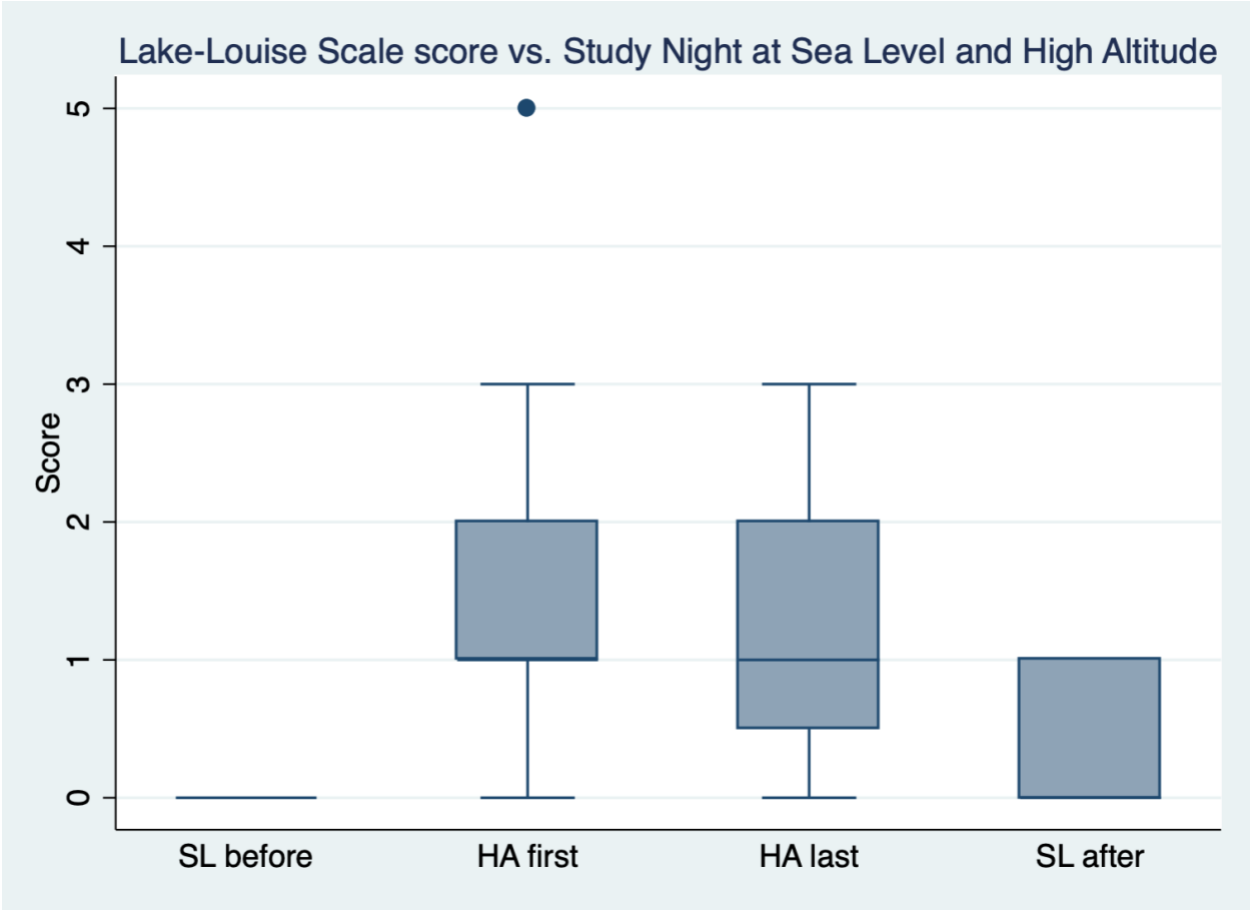

Supplement: Supp_FigS1.pdf [file Supp_FigS1.pdf]
